# Supplementary material for: Photothermal gold nanocages filled with temperature sensitive tetradecanol and encapsulated with glutathione responsive polycurcumin for controlled DOX delivery to maximize anti-MDR tumor effects
Source: Royal Society of Chemistry journal article supplement (doi:10.1039/c7tb01253e), 2017-01-01
Supplement: c7tb01253e1.pdf [file c7tb01253e1.pdf]

## Electronic Supplementary Information

### **Photothermal gold nanocages filled with temperature sensitive tetradecanol and encapsulated with glutathione responsive polycurcumin for controlled DOX delivery to maximize anti-MDR tumor effects**

Zhipeng Zhang,<sup>a,b</sup> Yun Wang,<sup>a</sup> Shaohui Xu,<sup>a</sup> Yanna Yu,<sup>a</sup> Abid Hussain,<sup>a</sup> Yuanyuan Shen<sup>a\*</sup> and Shengrong Guo<sup>a\*</sup>

---

<sup>a.</sup> School of Pharmacy, Shanghai Jiao Tong University, Shanghai 200240, China. E-mail: shenyuanyuan@sjtu.edu.cn, srguo@sjtu.edu.cn

<sup>b.</sup> School of Pharmacy, Hubei University of Science and Technology, Xianning 437100, China.

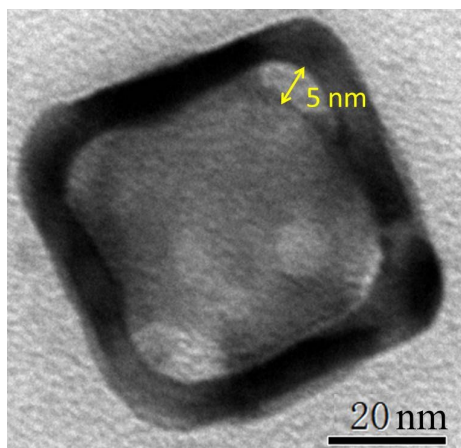

Fig. S1 TEM image of AuNC.

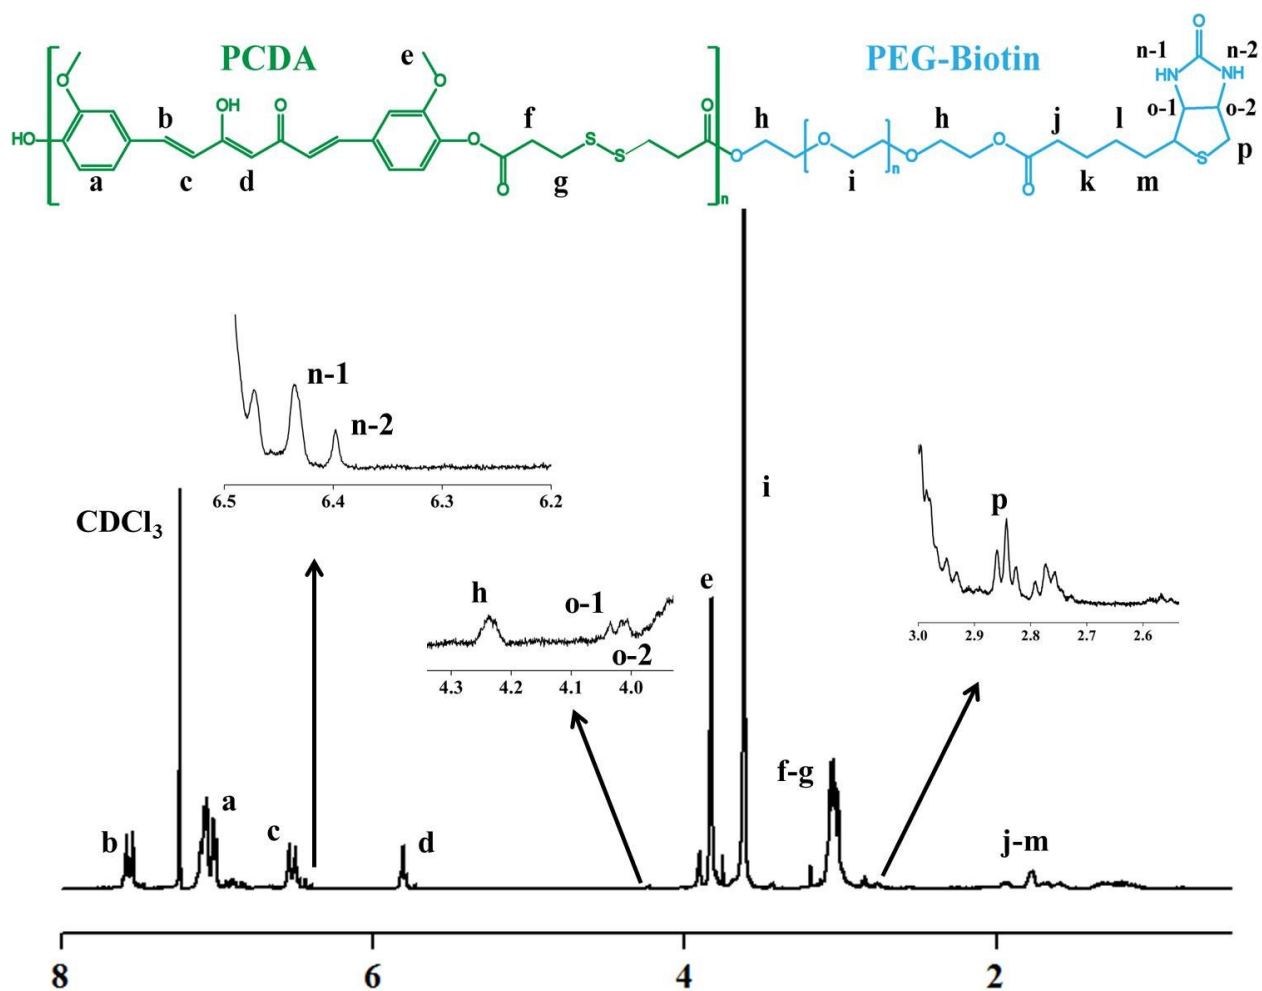

Fig. S2 <sup>1</sup>H-NMR spectra of Biotin-PEG-PCDA in CDCl<sub>3</sub>

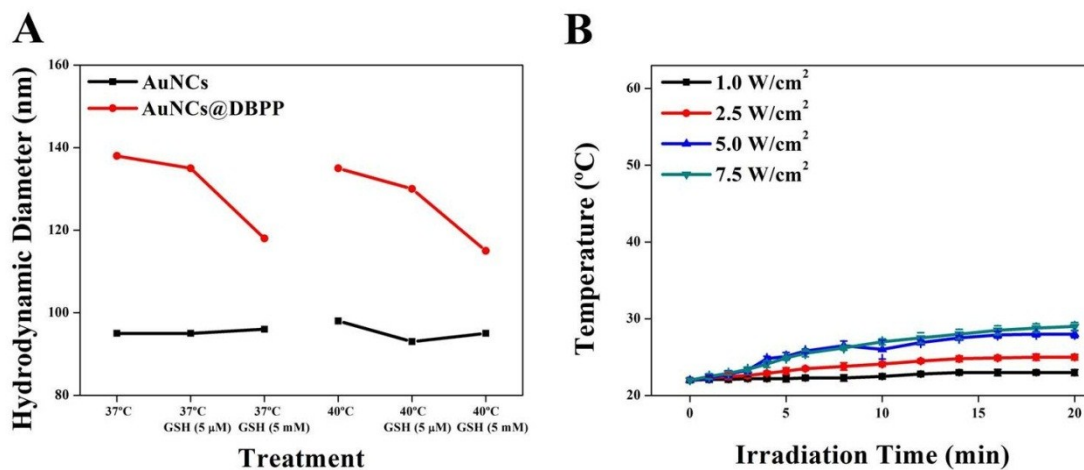

Fig. S3 (A) Change of hydrodynamic diameters of AuNCs and AuNCs@DBPP under the different treatment conditions. (B) Time-dependent change of the temperature of PBS (control) with NIR irradiation at different power densities

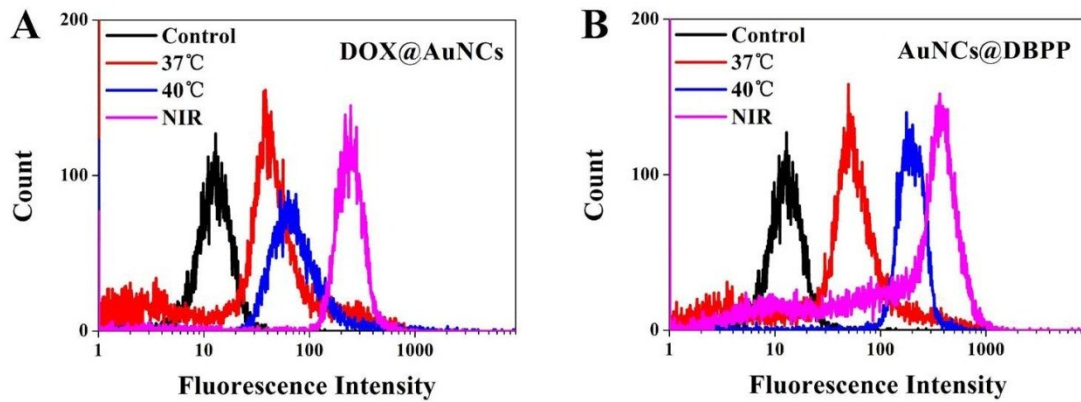

Fig. S4 Fluorescence intensity of (A) DOX@AuNCs and (B) AuNCs@DBPP under the different treatment conditions. Cells incubated with PBS were used as a control

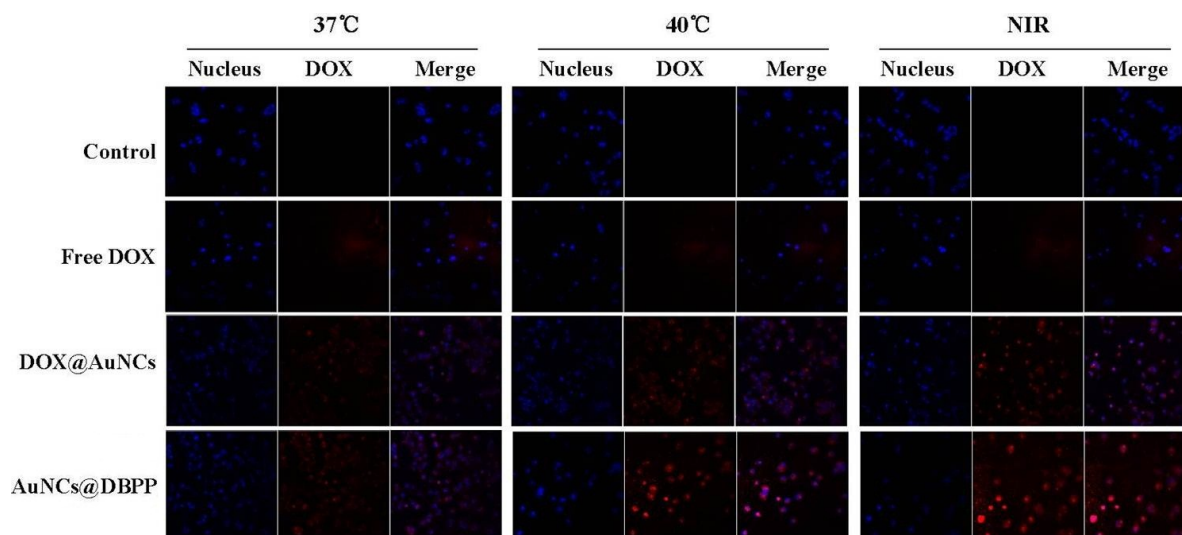

Fig. S5 CLSM images of MCF-7/ADR cells incubated with free DOX, DOX@AuNCs and AuNCs@DBPP at 37°C, at 40°C or under NIR irradiation. Blue fluorescence from Hoechst 33342 used to stain the nuclei; Red fluorescence is expressed by released DOX

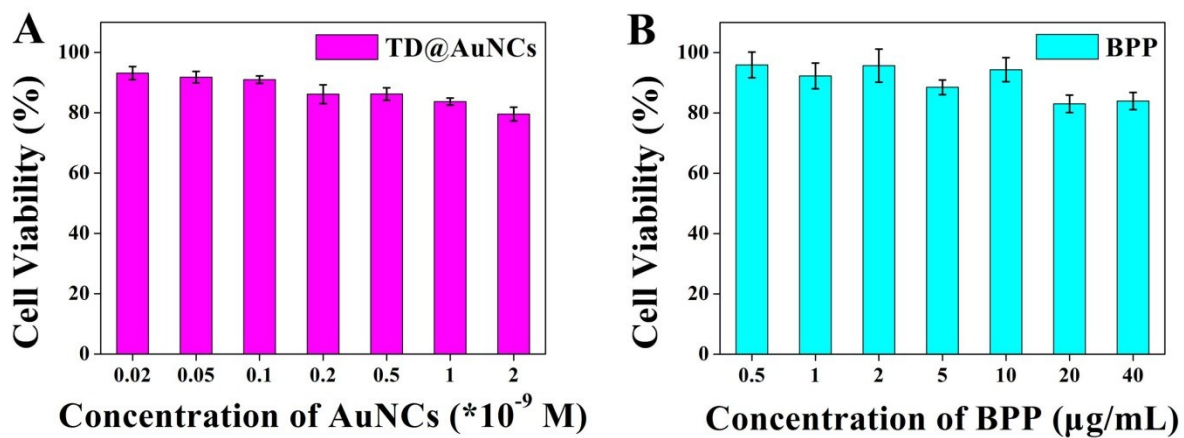

Fig. S6 Viabilities of MCF-7/ADR cells after incubations with (A) TD@AuNCs and (B) BPP.

The concentration for TD@AuNCs is calculated by AuNCs.

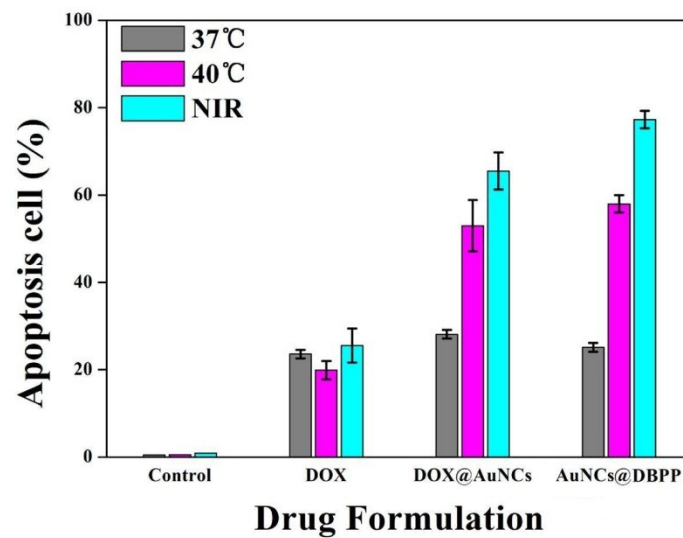

Fig. S7 Histogram showing the percentages of apoptotic cells in Figure 6



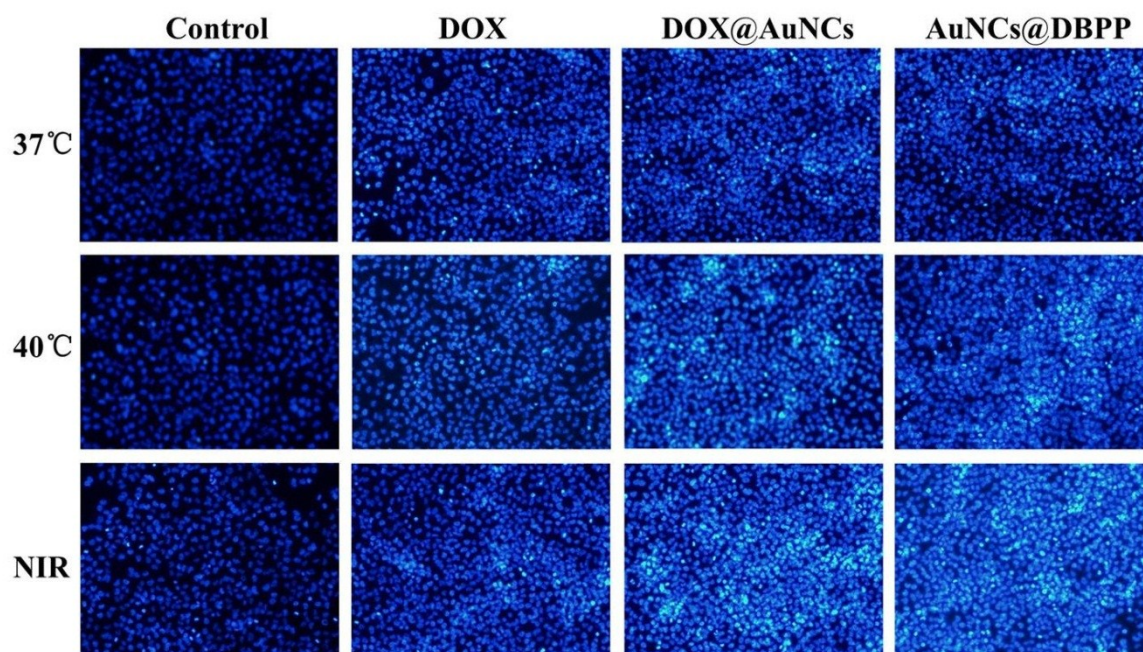

Fig. S8 Nuclear morphologies of MCF-7/ADR cells used Hoechst 33342 staining. Cells were incubated with free DOX, DOX@AuNCs and AuNCs@DBPP under the different treatment conditions

Table S1. IC<sub>50</sub> and IRDR (index of reversal of drug resistance) of various formulations of DOX against MCF-7/ADR cells cultured at 40°C for 2 h.

| Treatment  | IC <sub>50</sub> (µg/mL) | IRDR  |
|------------|--------------------------|-------|
| DOX        | 49.55                    | -     |
| DOX + BPP  | 16.98                    | 2.92  |
| DOX@AuNCs  | 6.26                     | 7.91  |
| AuNCs@DBPP | 1.08                     | 45.88 |

IRDR (index of reversal of drug resistance) = IC<sub>50</sub> (DOX) / IC<sub>50</sub> (various formulations of DOX)
